# Supplementary material for: The WAGR syndrome gene PRRG4 is a functional homologue of the commissureless axon guidance gene
Source: PubMed Central journal article supplement (PMC5578492; doi:10.1371/journal.pgen.1006865), 2017-08-31
Supplement: pgen.1006865.s001.pdf [file pgen.1006865.s001.pdf]

***Drosophila melanogaster* CG15760 is a candidate invertebrate Shisa-like protein**

MWLRPSPSHTNALQCLLLSLFLLLGLLPANVSARFCEGCTQGCTQGCCPPYQGGPRPLPPSSDSHVLNL  
FFATHWFFWCVVVAIILAILCAYSLWKKRRTLCGWGFNEHHTQSEGDSAGSCYA<sup>PPQY</sup>SRCNSFHHP<sup>PPP</sup>  
<sup>Y</sup>TEVTSK<sup>PDLY</sup>PLVFTCNDSGNGKNGSSSYLMSQSDQHFRYMANSSSSLSDFVNNSCVAGMLPESGG  
AGGAFHGAESGATQAASLNLSLAMGGLGGSVTGAAGTSGGSGTPVIYSNGCIQPNPLHSLENCQPSAQV  
SGVSSLANIGTPGSPPQATSPTGEVREILDQIRQLQAGVSYEQLLLNGTGAKPRLQHTLSTPSNSQQVLQ  
PILTTSASISGGTSGRSKKFFTSGSKTQPNKALYIPMAAIGGSGSGAQRCVLKSPVSSVVSGASFFVNRG  
RVARKGWITRSAP<sup>TP</sup>PGSALPPNRLGDDSP<sup>LL</sup>LLNEHDEDAID<sup>DE</sup>DEE<sup>Q</sup>EVVDRQRNHQETQRGHEDTDS  
ETEAEARNHRRQHRHHRGHRGHRRGQLE

<sup>CEGCTQGCCCTQGCC</sup>: Six cysteine motif characteristic of Shisa-like proteins

<sup>WFFW</sup>: motif consisting of four aromatic residues found in Shisa-like proteins

<sup>PPPY</sup>: PY motifs

Putative signal sequence

Transmembrane domain
