# Supplementary material for: The WAGR syndrome gene PRRG4 is a functional homologue of the commissureless axon guidance gene
Source: PubMed Central journal article supplement (PMC5578492; doi:10.1371/journal.pgen.1006865), 2017-08-31
Supplement: pgen.1006865.s002.pdf [file pgen.1006865.s002.pdf]

**Alignment of Commissureless and C. elegans C17G10.7**

```

Comm  MISTTDYPTVETTTTAEELYAEYISAPASSMSPAAIAEHLQQNQITFEIPSAHDLRHIDALNSFNALLQRIGNAAVSYDPAPP
C17G10 MDHSTRFRVHNWLRSRRLKFQSRMCLLM-LVMI-NFVNSVILTLEICGE-DSNM TLLM-FVNTF---VVFLSMYGL---
                + S      M      I      +T+EI      D      F      Y

Comm  SGWSPDGSISTEQLSKSVVLDLADLRDRSEESGESSWWSQIFGDADMHVIINYLWIGVVSSLVILSLVFLFSCYFYR-KFRTWKK
C17G10 -----YNFRPVFLSPNVLLKIILSSSAL-FYGLQMAETTSNSAIFV-WLTISIVFFILEIHTM-FSTTFDIIKQLNLR-
                + V+L      L      S      ++      +      ++ + W+ +      ++IL + ++ FS++F++ K----+

Comm  CNKDIRAQIHAASDSYSSHLVGCDSARLLLHQMQHPHRSSEAGFYQIESPPCYT----IATGLPSYDEALHH--QPR
C17G10 AYSK-----PPNYNQVMSIDVPPPSYEEALVRLEQNR
                K                        PP Y      I      PSY+EAL      Q R

Comm  HFAYGMKFVYPSLA AVHHHHHCISNWEKQEPLNKLQCKLSAAA AVEEDKADSSSSTSASASPSSSESSNLA
C17G10 ---TAAKNQSS-----
                K

Comm  TATPAICINMPSGRQDEEVDNSDSDAI AVAVAVAQSLQPAAPADDDCASLVVVVAA
C17G10 -----PKPDQPAQLNTCDLAHLVV
                QPA      D      LVV

```

**Alternative interpretation of C17G10.7 as a four-pass transmembrane protein**  
 Transmembrane domains are highlighted in blue.

```

C17G10.7 MDHSTRFRVHNWLRSRRLKFQSRMCLLMLVMINFNVSILTLEICGEDSNMTLLMFFVNTFVFLSMYGL
C17G10.7 YNFRPVFLSPNVLLKIILSSSALFYGLQMAETTSNSAIFVWLTISIVFFILEIHTMFSTTFDIIKQLNLR
C17G10.7 AYSKPPNYNQVMSIDVPPPSYEEALVRLEQNR TAAKNQSSPKPDQPAQLNTCDLAHLVV

```
